# Supplementary material for: Post-viral mental health sequelae in infected persons associated with COVID-19 and previous epidemics and pandemics: Systematic review and meta-analysis of prevalence estimates
Source: bioRxiv or medRxiv preprint supplement (doi:10.1101/2021.06.29.21259615), 2021-10-18
Supplement: Supplementary file [file media-1.pdf]

## Appendix

### Post-viral mental health sequelae: Systematic review and meta-analysis of prevalence proportions

Simeon Joel Zürcher, Céline Banzer, Christine Adamus, Anja I. Lehmann, Dirk Richter, Philipp Kerksieck

|                                                                                                                                                                                                                                   |    |
|-----------------------------------------------------------------------------------------------------------------------------------------------------------------------------------------------------------------------------------|----|
| <b>1. eTable 1:</b> PubMed search terms                                                                                                                                                                                           | 2  |
| <b>2. eTable 2:</b> PsycInfo and Embase search terms                                                                                                                                                                              | 2  |
| <b>3. eTable 3:</b> Inclusion and exclusion criteria                                                                                                                                                                              | 3  |
| <b>4. eTable 4:</b> Variables extracted from included studies                                                                                                                                                                     | 4  |
| <b>5. eTable 5:</b> Cut-off values by instruments for case detection to categorize domains and severity (at least mild or at least moderate-to-severe severity)                                                                   | 5  |
| <b>6. eFigure 1:</b> Summary of methodological quality appraisal of the studies included in the meta-analysis assessed by an adapted version of the Joanna Briggs Institute Critical Appraisal (JBI) tools for Prevalence Studies | 6  |
| <b>7 eTable 6:</b> Single and pooled estimates of studies on mental health prevalence rates according to domain, severity and time point                                                                                          | 8  |
| <b>8 eTable 7:</b> Test of moderators on mild or moderate mental health problem severity including all domains adjusted for follow-up time                                                                                        | 14 |

**eTable 1:** PubMed search terms

|                   |                                                                                                                                                                                                                                                                                                                                                                                                                                                                                                                                                                                |
|-------------------|--------------------------------------------------------------------------------------------------------------------------------------------------------------------------------------------------------------------------------------------------------------------------------------------------------------------------------------------------------------------------------------------------------------------------------------------------------------------------------------------------------------------------------------------------------------------------------|
| <b>Population</b> | Betacoronavirus <i>OR</i> Sars* <i>OR</i> COVID* <i>OR</i> 2019-nCoV <i>OR</i> Corona <i>OR</i> Coronavirus <i>OR</i> "Severe Acute Respiratory" <i>OR</i> Mers* <i>OR</i> "Middle East Respiratory" <i>OR</i> H1N1 <i>OR</i> Swine-Origin Influenza <i>OR</i> "Avian Influenza" <i>OR</i> "Avian Flu" <i>OR</i> H5N1 <i>OR</i> Ebola*                                                                                                                                                                                                                                         |
| <b>AND</b>        |                                                                                                                                                                                                                                                                                                                                                                                                                                                                                                                                                                                |
| <b>Outcomes</b>   | "impact of event scale" <i>OR</i> IES <i>OR</i> IES-R <i>OR</i> "center for epidemiologic studies depression scale" <i>OR</i> CES-D <i>OR</i> CESD-R <i>OR</i> "patient health questionnaire" <i>OR</i> PHQ <i>OR</i> PHQ-D <i>OR</i> PHQ-2 <i>OR</i> PHQ-4 <i>OR</i> PHQ-7 <i>OR</i> PHQ-9 <i>OR</i> PHQ-15 <i>OR</i> "Generalized Anxiety Disorder" <i>OR</i> GAD-2 <i>OR</i> GAD-7 <i>OR</i> "hospital anxiety and depression scale" <i>OR</i> HADS <i>OR</i> "general health questionnaire" <i>OR</i> GHQ <i>OR</i> GHQ-12 <i>OR</i> GHQ-28 <i>OR</i> GHQ-30 <i>OR</i> CHQ |
| <b>Filter</b>     | From 2002 to current (April 13, 2021)                                                                                                                                                                                                                                                                                                                                                                                                                                                                                                                                          |

**eTable 2:** PsycInfo and Embase search terms

|                   |                                                                                                                                                                                                                                                                                                                                                                                                                                                                                                                                                                                            |
|-------------------|--------------------------------------------------------------------------------------------------------------------------------------------------------------------------------------------------------------------------------------------------------------------------------------------------------------------------------------------------------------------------------------------------------------------------------------------------------------------------------------------------------------------------------------------------------------------------------------------|
| <b>Population</b> | Betacoronavirus <i>or</i> Sars* <i>or</i> COVID* <i>or</i> 2019-nCoV <i>or</i> Corona <i>or</i> Coronavirus <i>or</i> "Severe Acute Respiratory" <i>or</i> Mers* <i>or</i> "Middle East Respiratory" <i>or</i> H1N1 <i>or</i> Swine-Origin Influenza <i>or</i> "Avian Influenza" <i>or</i> "Avian Flu" <i>or</i> H5N1 <i>or</i> Ebola*                                                                                                                                                                                                                                                     |
| <b>AND</b>        |                                                                                                                                                                                                                                                                                                                                                                                                                                                                                                                                                                                            |
| <b>Outcomes</b>   | "impact of event scale" <i>or</i> IES <i>or</i> IES-R<br><i>or</i> "center for epidemiologic studies depression scale" <i>or</i> CES-D <i>or</i> CESD-R <i>or</i> "patient health questionnaire" <i>or</i> PHQ<br><i>or</i> PHQ-D <i>or</i> PHQ-2 <i>or</i> PHQ-4 <i>or</i> PHQ-7 <i>or</i> PHQ-9 <i>or</i> PHQ-15 <i>or</i> "Generalized Anxiety Disorder" <i>or</i> GAD-2 <i>or</i> GAD-7<br><i>or</i> "hospital anxiety and depression scale" <i>or</i> HADS <i>or</i> "general health questionnaire" <i>or</i> GHQ <i>or</i> GHQ-12 <i>or</i> GHQ-28<br><i>or</i> GHQ-30 <i>or</i> CHQ |
| <b>Filter</b>     | From 2002 to current (April 13, 2021)                                                                                                                                                                                                                                                                                                                                                                                                                                                                                                                                                      |

**eTable 3:** Inclusion and exclusion criteria

| <b>Population(s)</b>     | <b>Include</b>                                                                                                                                                                                                                                                                                                                                                                                                                                                                                                                                                                                                                   | <b>Exclude</b>                                                                                                                                                                                                                                                                                                                                                                                                                  |
|--------------------------|----------------------------------------------------------------------------------------------------------------------------------------------------------------------------------------------------------------------------------------------------------------------------------------------------------------------------------------------------------------------------------------------------------------------------------------------------------------------------------------------------------------------------------------------------------------------------------------------------------------------------------|---------------------------------------------------------------------------------------------------------------------------------------------------------------------------------------------------------------------------------------------------------------------------------------------------------------------------------------------------------------------------------------------------------------------------------|
|                          | <ul style="list-style-type: none"> <li>*Patients</li> <li>*Survivors</li> <li>*Individuals with suspected infection</li> <li>*Adults (≥18 yrs.)</li> </ul>                                                                                                                                                                                                                                                                                                                                                                                                                                                                       | <ul style="list-style-type: none"> <li>*Health care workers</li> <li>*General population</li> <li>*Other/special populations (e.g., physical chronic illness, cancer patients, renal transplantation, pregnant women, people with mental illness)</li> <li>*Quarantined individuals (relevant outcomes, setting and characteristics is not reported for cases that test positive or suspected for a virus infection)</li> </ul> |
| <b>Context</b>           | <b>Include</b>                                                                                                                                                                                                                                                                                                                                                                                                                                                                                                                                                                                                                   | <b>Exclude</b>                                                                                                                                                                                                                                                                                                                                                                                                                  |
|                          | <ul style="list-style-type: none"> <li>*Virus epidemics including:                             <ul style="list-style-type: none"> <li>**SARS-CoV-1</li> <li>**Swine flu (H1N1)</li> <li>**MERS-CoV</li> <li>**Avian influenza (H7N9)</li> <li>**Ebola virus</li> <li>**SARS-CoV-2</li> </ul> </li> </ul>                                                                                                                                                                                                                                                                                                                         | <ul style="list-style-type: none"> <li>*Other epidemics (e.g., HIV/AIDS)</li> <li>*Common influenza</li> <li>*Other context (e.g., natural disasters, occupational studies)</li> </ul>                                                                                                                                                                                                                                          |
| <b>Outcome/Condition</b> | <b>Include</b>                                                                                                                                                                                                                                                                                                                                                                                                                                                                                                                                                                                                                   | <b>Exclude</b>                                                                                                                                                                                                                                                                                                                                                                                                                  |
|                          | <ul style="list-style-type: none"> <li>*Prevalence rates provided based on established cut-off scores (or possibility to calculate it) as measured by any short or long form of the following instruments:                             <ul style="list-style-type: none"> <li>**Impact of Event Scale (IES)</li> <li>**The Center for Epidemiological Studies Depression Scale (CES-D)</li> <li>**The Patient Health Questionnaire (PHQ)</li> <li>**Generalized Anxiety Disorder Scale (GAD)</li> <li>**The Hospital Anxiety and Depression Scale (HADS)</li> <li>*The General Health Questionnaire (GHQ)</li> </ul> </li> </ul> | <ul style="list-style-type: none"> <li>*No prevalence rates provided/calculation not possible (e.g., only mean scores provided)</li> <li>*Prevalence rates assessed by other instruments (e.g., BAI, DASS)</li> <li>*Prevalence rates not based on established cut-off scores (e.g., data-driven cut-off scores like median grouping)</li> <li>*Provided IES prevalence rates for subscales only</li> </ul>                     |
| <b>Study design/Type</b> | <b>Include</b>                                                                                                                                                                                                                                                                                                                                                                                                                                                                                                                                                                                                                   | <b>Exclude</b>                                                                                                                                                                                                                                                                                                                                                                                                                  |
|                          | <ul style="list-style-type: none"> <li>*All studies that provide prevalence data:                             <ul style="list-style-type: none"> <li>*Clinical trial/experimental (only first measure if mental health intervention took place)</li> <li>*Cross-sectional study</li> <li>*Cohort study</li> <li>*Case control study</li> <li>*Case series</li> </ul> </li> </ul>                                                                                                                                                                                                                                                 | <ul style="list-style-type: none"> <li>*Qualitative study</li> <li>*Psychometric study/questionnaire validation</li> <li>*Editorial/Letter</li> <li>*Mini-study</li> <li>*Review</li> <li>*Conference abstract</li> <li>*Non-scientific article</li> <li>*Studies with <math>n &lt; 5</math></li> </ul>                                                                                                                         |
| <b>Other criteria</b>    | <b>Include</b>                                                                                                                                                                                                                                                                                                                                                                                                                                                                                                                                                                                                                   |                                                                                                                                                                                                                                                                                                                                                                                                                                 |
|                          | <ul style="list-style-type: none"> <li>*Languages: English, German, Spanish, Dutch or French</li> </ul>                                                                                                                                                                                                                                                                                                                                                                                                                                                                                                                          |                                                                                                                                                                                                                                                                                                                                                                                                                                 |

**eTable 4:** Variables extracted from included studies

| Extracted variable          | Label/unit                                                                                                                                                                                                                                                                                                                                                                |
|-----------------------------|---------------------------------------------------------------------------------------------------------------------------------------------------------------------------------------------------------------------------------------------------------------------------------------------------------------------------------------------------------------------------|
| DOI                         | digital object identifier                                                                                                                                                                                                                                                                                                                                                 |
| First author                | last name of first author                                                                                                                                                                                                                                                                                                                                                 |
| Year of publication         | YYYY                                                                                                                                                                                                                                                                                                                                                                      |
| Title of publication        | full title                                                                                                                                                                                                                                                                                                                                                                |
| County                      | country                                                                                                                                                                                                                                                                                                                                                                   |
| World region                | Africa, Amerika, Asia (excluding China), China, Europe                                                                                                                                                                                                                                                                                                                    |
| Design                      | cross-sectional, longitudinal (repeated measures design), intervention study                                                                                                                                                                                                                                                                                              |
| Sampling                    | random or complete sample (attempt to include all eligible participants), non-random or unknown sampling strategy (e.g., convenience/snowball)                                                                                                                                                                                                                            |
| Response rate               | numerator: Number of individuals included<br>denominator: Number of eligible individuals (excluding deceased)                                                                                                                                                                                                                                                             |
| Epidemic                    | severe acute respiratory syndrome coronavirus 1 (SARS-CoV-1), swine flu (H1N1), Middle East respiratory syndrome coronavirus (MERS-CoV), avian influenza (H7N9), Ebolavirus, severe acute respiratory syndrome coronavirus 2 (SARS-CoV-2)                                                                                                                                 |
| Sex                         | % of female sex                                                                                                                                                                                                                                                                                                                                                           |
| Age                         | mean or median and standard deviation                                                                                                                                                                                                                                                                                                                                     |
| Psychological condition     | percent with prior psychiatric condition including a history of psychiatric illness or condition or history of psychiatric visits                                                                                                                                                                                                                                         |
| Duration of hospitalization | mean and standard deviation of hospitalization or treatment                                                                                                                                                                                                                                                                                                               |
| Intensive care unit         | % of included individuals in need of ICU care                                                                                                                                                                                                                                                                                                                             |
| Health care workers         | % of individuals working in the health care sector                                                                                                                                                                                                                                                                                                                        |
| Education                   | % of individuals with higher education (tertiary education, university degree)                                                                                                                                                                                                                                                                                            |
| Treatment received          | inpatient, outpatient, miscellaneous (inpatient and outpatient)                                                                                                                                                                                                                                                                                                           |
| Time point of assessment    | mean or median months since discharge/treatment, further coded as acute ( $\leq 1$ months), ongoing (1-3 Months), post-illness ( $> 3$ months)                                                                                                                                                                                                                            |
| Instrument                  | IES, IES-R, IES-6 (short form), CES-D, CESD-R (revised), CES-D (short form), PHQ-D (full version), PHQ-9 (depression module), PHQ-2 (depression module – short form), PHQ-4 (depression and anxiety module – short form), PHQ Stress, PHQ-15 (somatization module), PHQ Panic, GAD-2 (short form), GAD-7, GHQ-12, GHQ-28, HADS anxiety, HADS depression, HADS total scale |
| Cut-off score               | cut-off used for case detection                                                                                                                                                                                                                                                                                                                                           |
| Number of cases             | detected cases                                                                                                                                                                                                                                                                                                                                                            |
| Total number                | number assessed (number of valid, non-missing responses)                                                                                                                                                                                                                                                                                                                  |

**eTable 5:** Cut-off values by instruments for case detection to categorize domains and severity (at least mild or at least moderate-to-severe severity)

| Assessment instrument and severity classification                 | Cut-off value for case classification              | Severity and domain                      |
|-------------------------------------------------------------------|----------------------------------------------------|------------------------------------------|
| <b>General Anxiety Disorder Scale</b>                             |                                                    |                                          |
| GAD-2 (mild)                                                      | ≥1                                                 | mild anxiety                             |
| GAD-7 (mild)                                                      | ≥5                                                 | mild anxiety                             |
| GAD-2 (moderate-to-severe)                                        | ≥3                                                 | moderate-to-severe anxiety               |
| GAD-7 (moderate-to-severe)                                        | ≥10                                                | moderate-to-severe anxiety               |
| <b>Hospital Anxiety and Depression Scale; anxiety subscale</b>    |                                                    |                                          |
| HADS-Anxiety (mild)                                               | ≥8                                                 | mild anxiety                             |
| HADS-Anxiety (moderate-to-severe)                                 | ≥11 (one study with ≥10)                           | moderate-to-severe anxiety               |
| <b>Patient Health Questionnaire; Depression</b>                   |                                                    |                                          |
| PHQ-2 (mild)                                                      | ≥1                                                 | mild depression                          |
| PHQ-9 (mild)                                                      | ≥5                                                 | mild depression                          |
| PHQ-2 (moderate-to-severe)                                        | ≥3                                                 | moderate-to-severe depression            |
| PHQ-9 (moderate-to-severe)                                        | ≥10                                                | moderate-to-severe depression            |
| <b>Center for Epidemiologic Studies Depression Scale</b>          |                                                    |                                          |
| CES-D (no severity classification, indication of depression)      | ≥16 or >17 in males and >23 in females             | moderate-to-severe depression            |
| <b>Hospital Anxiety and Depression Scale; depression subscale</b> |                                                    |                                          |
| HADS-depression (mild)                                            | ≥8                                                 | mild depression                          |
| HADS-depression (moderate-to-severe)                              | ≥11 (one study with ≥10)                           | moderate-to-severe depression            |
| <b>Impact of Event Scale</b>                                      |                                                    |                                          |
| IES (mild)                                                        | ≥26                                                | mild post-traumatic stress               |
| IES-R (mild)                                                      | ≥24                                                | mild post-traumatic stress               |
| IES (moderate-to-severe)                                          | ≥30                                                | moderate-to-severe post-traumatic stress |
| IES-R (moderate-to-severe)                                        | ≥33                                                | moderate-to-severe post-traumatic stress |
| IES-R (moderate-to-severe)                                        | >2 (surpassing a mean score of 2 in all subscales) | moderate-to-severe post-traumatic stress |
| IES-6 (moderate-to-severe)                                        | ≥10                                                | moderate-to-severe post-traumatic stress |
| <b>General Health Questionnaire</b>                               |                                                    |                                          |
| GHQ-12                                                            | 3 (0-0-1-1 scoring system)                         | moderate-to-severe general distress      |
| GHQ-28                                                            | 24 (0-1-2-3 Likert scale scoring)                  | moderate-to-severe general distress      |
| GHQ-28                                                            | ≥ 5 (0-0-1-1 scoring system)                       | moderate-to-severe general distress      |
| <b>Hospital Anxiety and Depression Scale; Total scale</b>         |                                                    |                                          |
| HADS-anxiety and depression (total scale)                         | >16                                                | mild anxiety and/or depression           |
| <b>Patient Health Questionnaire; somatization module</b>          |                                                    |                                          |
| PHQ-15 somatization (mild)                                        | ≥5                                                 | mild somatization                        |
| PHQ-15 somatization (moderate-to-severe)                          | ≥10                                                | moderate-to-severe somatization          |

**eFigure 1:** Summary of methodological quality appraisal of the studies included in the meta-analysis assessed by an adapted version of the Joanna Briggs Institute Critical Appraisal (JBI) tools for Prevalence Studies

| Author & Year           | Quality Item |                 |             |                  |          |            |          |               |
|-------------------------|--------------|-----------------|-------------|------------------|----------|------------|----------|---------------|
|                         | Sample frame | Sampling method | Sample size | Subjects setting | Coverage | Procedures | Analyses | Response Rate |
| Akinci and Basar (2021) | ?            | ×               | ×           | ×                | ?        | ✓          | ✓        | ?             |
| Bah et al. (2020)       | ×            | ×               | ×           | ×                | ✓        | ×          | ✓        | ✓             |
| Bellan et al. (2021)    | ✓            | ✓               | ✓           | ✓                | ✓        | ✓          | ✓        | ✓             |
| Bonazza et al. (2020)   | ✓            | ✓               | ✓           | ✓                | ?        | ✓          | ✓        | ?             |
| Chen et al. (2021)      | ?            | ?               | ✓           | ×                | ✓        | ✓          | ×        | ✓             |
| Chen et al. (2020)      | ?            | ?               | ×           | ×                | ✓        | ×          | ✓        | ?             |
| Cheng et al. (2004)     | ?            | ?               | ×           | ×                | ✓        | ✓          | ✓        | ✓             |
| Chieffo et al. (2020)   | ?            | ?               | ×           | ✓                | ?        | ✓          | ✓        | ?             |
| D’Cruz et al. (2021)    | ✓            | ✓               | ✓           | ✓                | ✓        | ?          | ✓        | ✓             |
| Etard et al. (2017)     | ✓            | ✓               | ✓           | ✓                | ✓        | ✓          | ✓        | ✓             |
| Guo et al. (2020)       | ?            | ?               | ×           | ✓                | ✓        | ✓          | ×        | ?             |
| He et al. (2021)        | ?            | ?               | ×           | ✓                | ✓        | ✓          | ✓        | ×             |
| Heyns et al. (2021)     | ✓            | ✓               | ✓           | ✓                | ✓        | ✓          | ✓        | ×             |
| Horn et al. (2020)      | ✓            | ✓               | ✓           | ✓                | ✓        | ✓          | ×        | ✓             |
| Hu et al. (2020)        | ?            | ?               | ×           | ✓                | ✓        | ×          | ✓        | ×             |
| Islam et al. (2021)     | ×            | ×               | ✓           | ×                | ×        | ✓          | ✓        | ✓             |
| Jeong et al. (2016)     | ✓            | ×               | ×           | ×                | ✓        | ✓          | ✓        | ×             |
| Jeong et al. (2020)     | ?            | ?               | ×           | ✓                | ✓        | ✓          | ✓        | ?             |
| Ju et al. (2021)        | ✓            | ✓               | ✓           | ✓                | ?        | ✓          | ?        | ×             |
| Kandeger et al. (2020)  | ✓            | ✓               | ✓           | ×                | ✓        | ✓          | ×        | ×             |
| Kang et al. (2020)      | ✓            | ✓               | ✓           | ×                | ✓        | ✓          | ×        | ✓             |
| Keita et al. (2017)     | ✓            | ✓               | ✓           | ✓                | ✓        | ✓          | ✓        | ×             |
| Kim et al. (2018)       | ✓            | ✓               | ✓           | ✓                | ✓        | ✓          | ✓        | ×             |
| Kim et al. (2020)       | ✓            | ✓               | ✓           | ×                | ?        | ✓          | ✓        | ×             |
| Kong et al. (2020)      | ?            | ?               | ×           | ×                | ✓        | ✓          | ✓        | ✓             |
| Kwek et al. (2006)      | ?            | ✓               | ?           | ✓                | ×        | ?          | ✓        | ✓             |
| Lam et al. (2009)       | ✓            | ✓               | ✓           | ×                | ?        | ✓          | ×        | ×             |
| Lee et al. (2007)       | ?            | ?               | ?           | ×                | ?        | ✓          | ✓        | ✓             |
| Lee et al. (2019)       | ✓            | ✓               | ✓           | ✓                | ?        | ✓          | ✓        | ✓             |
| Li et al. (2020)        | ?            | ?               | ×           | ×                | ✓        | ?          | ✓        | ×             |
| Luyt et al. (2012)      | ✓            | ✓               | ✓           | ✓                | ✓        | ?          | ✓        | ✓             |
| Ma et al. (2020)        | ?            | ?               | ✓           | ?                | ✓        | ✓          | ✓        | ✓             |
| Mak et al. (2009)       | ✓            | ✓               | ✓           | ✓                | ✓        | ✓          | ✓        | ✓             |
| Martillo et al. (2021)  | ✓            | ✓               | ✓           | ✓                | ×        | ✓          | ✓        | ×             |
| Mazza et al. (2020)     | ?            | ?               | ?           | ✓                | ✓        | ✓          | ✓        | ×             |
| Mina et al. (2021)      | ×            | ×               | ×           | ×                | ×        | ✓          | ✓        | ×             |

**eFigure 1:** Continued

| Author & Year               | Quality Item |                 |             |                  |          |             |          |               |
|-----------------------------|--------------|-----------------|-------------|------------------|----------|-------------|----------|---------------|
|                             | Sample frame | Sampling method | Sample size | Subjects setting | Coverage | Proce-dures | Analyses | Response Rate |
| Morin et al. (2021)         | ✓            | ✓               | ✓           | ✓                | ✓        | ✓           | ✓        | ✓             |
| Mowla et al. (2021)         | ✓            | ✓               | ✓           | ✗                | ✗        | ✓           | ✓        | ✓             |
| Olanipekun et al. (2021)    | ✓            | ✓               | ✓           | ✓                | ✗        | ✓           | ✓        | ✓             |
| Park et al. (2020)          | ✓            | ✓               | ✓           | ✓                | ✓        | ?           | ✓        | ✗             |
| Parker et al. (2021)        | ✓            | ✓               | ✓           | ✓                | ✗        | ✓           | ✓        | ✗             |
| Paz et al. (2020)           | ✗            | ?               | ✓           | ✗                | ✓        | ✓           | ✓        | ✗             |
| Poyraz et al. (2021)        | ✓            | ✓               | ✓           | ✓                | ✗        | ✗           | ✓        | ✗             |
| Raman et al. (2021)         | ✓            | ✓               | ✓           | ✓                | ✓        | ✓           | ✓        | ✗             |
| Rass et al. (2021)          | ✓            | ✓               | ✓           | ✓                | ✓        | ?           | ✓        | ✓             |
| Sahan et al. (2021)         | ✓            | ✓               | ✓           | ✓                | ✓        | ✓           | ✓        | ✓             |
| Samrah et al. (2020)        | ✓            | ✓               | ✓           | ✓                | ✓        | ✓           | ✓        | ✓             |
| Secor et al. (2020)         | ✓            | ✓               | ✓           | ✗                | ?        | ✓           | ✓        | ?             |
| Sheng et al. (2005)         | ?            | ?               | ✗           | ✓                | ✗        | ✓           | ✓        | ?             |
| Speth et al. (2020)         | ✓            | ✓               | ✓           | ✗                | ✓        | ?           | ✓        | ✗             |
| van den Borst et al. (2020) | ✓            | ✓               | ✓           | ✓                | ✓        | ?           | ✓        | ✓             |
| Wang et al. (2021)          | ✓            | ✓               | ✓           | ✗                | ✗        | ✓           | ✓        | ✓             |
| Wu et al. (2005a)           | ✓            | ✓               | ✓           | ✓                | ✓        | ✓           | ✓        | ✗             |
| Wu et al. (2005b)           | ?            | ?               | ?           | ✗                | ✓        | ✓           | ✓        | ✓             |
| Xu et al. (2021)            | ✓            | ?               | ?           | ✗                | ✓        | ✓           | ✓        | ?             |
| Yadav et al. (2021)         | ?            | ?               | ?           | ✓                | ✗        | ?           | ✓        | ✗             |
| Zarghami et al. (2020)      | ✓            | ✓               | ✓           | ✓                | ?        | ✓           | ✗        | ✗             |
| Zhang et al. (2020a)        | ?            | ✗               | ✗           | ✓                | ✓        | ✓           | ✓        | ?             |
| Zhang et al. (2020b)        | ✗            | ✗               | ✓           | ✗                | ✓        | ✓           | ✓        | ?             |

✓ =yes; ✗ =no; ? =unclear

Sample frame=was the sample frame appropriate to assess the target population? Sampling=were the study participants selected/recruited in an appropriate way? Sample size=was the sample size adequate? Subjects Setting=were the study subjects and setting described in detail? Coverage=was data analysis conducted with sufficient coverage of the identified sample? Procedures=was the condition measured in a standardized, reliable way for all participants? Analyses=was there appropriate statistical analysis? Response rate=was the response rate adequate, and if not, was the low response rate managed appropriately?

**eTable 6:** Single and pooled estimates of studies on mental health prevalence rates according to domain, severity and timepoint

| Severity, Domain, Timepoint<br>First author | Year  | Country      | Epidemic   | No. of cases | Sample size | Pooled prevalence (95% CI) |
|---------------------------------------------|-------|--------------|------------|--------------|-------------|----------------------------|
| <b>Mild anxiety, acute</b>                  |       |              |            |              |             |                            |
| Chen et al.                                 | 2020  | China        | SARS-CoV-2 | 6            | 31          | 19.4 (7.0-35.4)            |
| Guo et al.                                  | 2020  | China        | SARS-CoV-2 | 57           | 103         | 55.3 (45.6-64.9)           |
| He et al.                                   | 2021  | China        | SARS-CoV-2 | 34           | 65          | 52.3 (40.1-64.4)           |
| Heyns et al.                                | 2021  | Belgium      | SARS-CoV-2 | 16           | 47          | 34.0 (21.1-48.3)           |
| Hu et al.                                   | 2020  | China        | SARS-CoV-2 | 33           | 85          | 38.8 (28.7-49.5)           |
| Ju et al.                                   | 2021  | China        | SARS-CoV-2 | 41           | 95          | 43.2 (33.3-53.3)           |
| Ju et al.                                   | 2021  | China        | SARS-CoV-2 | 36           | 95          | 37.9 (28.4-47.9)           |
| Kang et al.                                 | 2020  | South Korea  | SARS-CoV-2 | 16           | 107         | 15.0 (8.8-22.4)            |
| Kim et al.                                  | 2020  | South Korea  | SARS-CoV-2 | 6            | 33          | 18.2 (6.6-33.4)            |
| Kong et al.                                 | 2020  | China        | SARS-CoV-2 | 50           | 144         | 34.7 (27.1-42.7)           |
| Li et al.                                   | 2020  | China        | SARS-CoV-2 | 41           | 99          | 41.4 (31.9-51.3)           |
| Mina et al.                                 | 2021  | Bangladesh   | SARS-CoV-2 | 92           | 145         | 63.4 (55.4-71.1)           |
| Park et al.                                 | 2020  | South Korea  | MERS-CoV   | 44           | 63          | 69.8 (57.9-80.6)           |
| Parker et al.                               | 2021  | USA          | SARS-CoV-2 | 21           | 58          | 36.2 (24.3-49.1)           |
| Paz et al.                                  | 2020  | Ecuador      | SARS-CoV-2 | 441          | 759         | 58.1 (54.6-61.6)           |
| Speth et al.                                | 2020  | Switzerland  | SARS-CoV-2 | 51           | 114         | 44.7 (35.7-54.0)           |
| Wang et al.                                 | 2021  | China        | SARS-CoV-2 | 213          | 460         | 46.3 (41.8-50.9)           |
| Yadav et al.                                | 2021  | India        | SARS-CoV-2 | 67           | 100         | 67.0 (57.4-75.9)           |
| Zarghami et al.                             | 2020  | Iran         | SARS-CoV-2 | 7            | 30          | 23.3 (9.7-40.4)            |
| Zarghami et al.                             | 2020  | Iran         | SARS-CoV-2 | 17           | 52          | 32.7 (20.5-46.1)           |
| Zhang et al.                                | 2020a | China        | SARS-CoV-2 | 30           | 30          | 100.0 (94.3-100.0)         |
| Zhang et al.                                | 2020b | China        | SARS-CoV-2 | 62           | 296         | 20.9 (16.5-25.8)           |
| <b>Summary Effect</b>                       |       |              |            | <b>1381</b>  | <b>3011</b> | <b>44.7 (34.0-55.6)</b>    |
| <b>Mild anxiety, ongoing</b>                |       |              |            |              |             |                            |
| Bonazza et al.                              | 2020  | Italy        | SARS-CoV-2 | 73           | 261         | 28.0 (22.7-33.6)           |
| Kwek et al.                                 | 2006  | Singapore    | SARS-CoV-1 | 21           | 63          | 33.3 (22.2-45.5)           |
| Raman et al.                                | 2021  | UK           | SARS-CoV-2 | 22           | 57          | 38.6 (26.3-51.6)           |
| Rass et al.                                 | 2021  | Austria      | SARS-CoV-2 | 17           | 98          | 17.3 (10.4-25.5)           |
| <b>Summary Effect</b>                       |       |              |            | <b>133</b>   | <b>479</b>  | <b>28.3 (20.0-37.5)</b>    |
| <b>Mild anxiety, post-illness</b>           |       |              |            |              |             |                            |
| Bah et al.                                  | 2020  | Sierra Leone | Ebolavirus | 49           | 197         | 24.9 (19.1-31.2)           |
| Luyt et al.                                 | 2012  | France       | H1N1       | 20           | 37          | 54.1 (37.7-69.9)           |
| Morin et al.                                | 2021  | France       | SARS-CoV-2 | 53           | 169         | 31.4 (24.6-38.6)           |
| Park et al.                                 | 2020  | South Korea  | MERS-CoV   | 20           | 63          | 31.7 (20.8-43.8)           |
| Secor et al.                                | 2020  | Liberia      | Ebolavirus | 74           | 203         | 36.5 (30.0-43.2)           |
| Secor et al.                                | 2020  | Sierra Leone | Ebolavirus | 317          | 751         | 42.2 (38.7-45.8)           |
| Secor et al.                                | 2020  | Guinea       | Ebolavirus | 120          | 530         | 22.6 (19.2-26.3)           |
| <b>Summary Effect</b>                       |       |              |            | <b>653</b>   | <b>1950</b> | <b>33.5 (24.8-42.7)</b>    |



**eTable 6:** Continued

| Severity, Domain, Timepoint<br>First author | Year  | Country     | Epidemic   | No. of<br>cases | Sample<br>size | Pooled prevalence (95% CI) |
|---------------------------------------------|-------|-------------|------------|-----------------|----------------|----------------------------|
| <b>Moderate-to-severe anxiety, acute</b>    |       |             |            |                 |                |                            |
| Akinci and Basar                            | 2021  | Turkey      | SARS-CoV-2 | 25              | 189            | 13.2 (8.7-18.5)            |
| Chen et al.                                 | 2021  | China       | SARS-CoV-2 | 147             | 898            | 16.4 (14.0-18.9)           |
| Chen et al.                                 | 2020  | China       | SARS-CoV-2 | 3               | 31             | 9.7 (1.3-23.1)             |
| Guo et al.                                  | 2020  | China       | SARS-CoV-2 | 7               | 103            | 6.8 (2.6-12.6)             |
| He et al.                                   | 2021  | China       | SARS-CoV-2 | 10              | 65             | 15.4 (7.5-25.3)            |
| Hu et al.                                   | 2020  | China       | SARS-CoV-2 | 14              | 85             | 16.5 (9.3-25.2)            |
| Jeong et al.                                | 2016  | South Korea | MERS-CoV   | 17              | 36             | 47.2 (31.0-63.7)           |
| Jeong et al.                                | 2020  | South Korea | SARS-CoV-2 | 13              | 126            | 10.3 (5.5-16.3)            |
| Ju et al.                                   | 2021  | China       | SARS-CoV-2 | 16              | 95             | 16.8 (9.9-25.1)            |
| Ju et al.                                   | 2021  | China       | SARS-CoV-2 | 11              | 95             | 11.6 (5.8-18.9)            |
| Kandeger et al.                             | 2020  | Turkey      | SARS-CoV-2 | 16              | 84             | 19.0 (11.3-28.2)           |
| Kang et al.                                 | 2020  | South Korea | SARS-CoV-2 | 2               | 107            | 1.9 (0.0-5.6)              |
| Kong et al.                                 | 2020  | China       | SARS-CoV-2 | 25              | 144            | 17.4 (11.6-24.0)           |
| Li et al.                                   | 2020  | China       | SARS-CoV-2 | 15              | 99             | 15.2 (8.7-23.0)            |
| Mina et al.                                 | 2021  | Bangladesh  | SARS-CoV-2 | 38              | 145            | 26.2 (19.3-33.7)           |
| Mina et al.                                 | 2021  | Bangladesh  | SARS-CoV-2 | 42              | 145            | 29.0 (21.8-36.6)           |
| Park et al.                                 | 2020  | South Korea | MERS-CoV   | 33              | 63             | 52.4 (40.0-64.7)           |
| Parker et al.                               | 2021  | USA         | SARS-CoV-2 | 8               | 58             | 13.8 (5.9-24.0)            |
| Paz et al.                                  | 2020  | Ecuador     | SARS-CoV-2 | 171             | 759            | 22.5 (19.6-25.6)           |
| Sahan et al.                                | 2021  | Turkey      | SARS-CoV-2 | 98              | 281            | 34.9 (29.4-40.6)           |
| Speth et al.                                | 2020  | Switzerland | SARS-CoV-2 | 12              | 114            | 10.5 (5.5-16.9)            |
| Wang et al.                                 | 2021  | China       | SARS-CoV-2 | 91              | 460            | 19.8 (16.3-23.6)           |
| Wu et al.                                   | 2005a | China       | SARS-CoV-1 | 28              | 195            | 14.4 (9.8-19.7)            |
| Wu et al.                                   | 2005b | China       | SARS-CoV-1 | 17              | 131            | 13.0 (7.7-19.3)            |
| Yadav et al.                                | 2021  | India       | SARS-CoV-2 | 13              | 100            | 13.0 (7.0-20.4)            |
| Zhang et al.                                | 2020a | China       | SARS-CoV-2 | 23              | 30             | 76.7 (59.6-90.3)           |
| <b>Summary Effect</b>                       |       |             |            | <b>895</b>      | <b>4638</b>    | <b>19.2 (13.5-25.7)</b>    |
| <b>Moderate-to-severe anxiety, ongoing</b>  |       |             |            |                 |                |                            |
| Bonazza et al.                              | 2020  | Italy       | SARS-CoV-2 | 35              | 261            | 13.4 (9.5-17.8)            |
| D´Cruz et al.                               | 2021  | UK          | SARS-CoV-2 | 25              | 113            | 22.1 (14.9-30.3)           |
| Kwek et al.                                 | 2006  | Singapore   | SARS-CoV-1 | 11              | 63             | 17.5 (9.0-27.9)            |
| Poyraz et al.                               | 2021  | Turkey      | SARS-CoV-2 | 50              | 284            | 17.6 (13.4-22.3)           |
| Raman et al.                                | 2021  | UK          | SARS-CoV-2 | 8               | 57             | 14.0 (6.0-24.4)            |
| Rass et al.                                 | 2021  | Austria     | SARS-CoV-2 | 7               | 98             | 7.1 (2.7-13.2)             |
| van den Borst et al.                        | 2020  | Netherlands | SARS-CoV-2 | 12              | 124            | 9.7 (5.0-15.6)             |
| Wu et al.                                   | 2005b | China       | SARS-CoV-1 | 18              | 131            | 13.7 (8.3-20.2)            |
| <b>Summary Effect</b>                       |       |             |            | <b>166</b>      | <b>1131</b>    | <b>14.1 (11.1-17.5)</b>    |

**eTable 6:** Continued

| Severity, Domain, Timepoint<br>First author         | Year  | Country      | Epidemic   | No. of<br>cases | Sample<br>size | Pooled prevalence (95% CI) |
|-----------------------------------------------------|-------|--------------|------------|-----------------|----------------|----------------------------|
| <b>Moderate-to-severe anxiety,<br/>post-illness</b> |       |              |            |                 |                |                            |
| Jeong et al.                                        | 2016  | South Korea  | MERS-CoV   | 7               | 36             | 19.4 (7.9-34.2)            |
| Mak et al.                                          | 2009  | China        | SARS-CoV-1 | 14              | 90             | 15.6 (8.7-23.9)            |
| Park et al.                                         | 2020  | South Korea  | MERS-CoV   | 9               | 63             | 14.3 (6.6-24.1)            |
| Secor et al.                                        | 2020  | Liberia      | Ebolavirus | 20              | 203            | 9.9 (6.1-14.4)             |
| Secor et al.                                        | 2020  | Sierra Leone | Ebolavirus | 80              | 751            | 10.7 (8.5-13.0)            |
| Secor et al.                                        | 2020  | Guinea       | Ebolavirus | 22              | 530            | 4.2 (2.6-6.0)              |
| <b>Summary Effect</b>                               |       |              |            | <b>152</b>      | <b>1673</b>    | <b>12.1 (5.3-21.1)</b>     |
| <b>Mild depression, acute</b>                       |       |              |            |                 |                |                            |
| Akinci and Basar                                    | 2021  | Turkey       | SARS-CoV-2 | 82              | 189            | 43.4 (36.4-50.5)           |
| Chen et al.                                         | 2020  | China        | SARS-CoV-2 | 10              | 31             | 32.3 (16.8-49.9)           |
| Guo et al.                                          | 2020  | China        | SARS-CoV-2 | 62              | 103            | 60.2 (50.5-69.5)           |
| He et al.                                           | 2021  | China        | SARS-CoV-2 | 31              | 65             | 47.7 (35.6-59.9)           |
| Heyns et al.                                        | 2021  | Belgium      | SARS-CoV-2 | 16              | 47             | 34.0 (21.1-48.3)           |
| Hu et al.                                           | 2020  | China        | SARS-CoV-2 | 39              | 85             | 45.9 (35.4-56.6)           |
| Islam et al.                                        | 2021  | Bangladesh   | SARS-CoV-2 | 698             | 1002           | 69.7 (66.8-72.5)           |
| Ju et al.                                           | 2021  | China        | SARS-CoV-2 | 38              | 95             | 40.0 (30.3-50.1)           |
| Ju et al.                                           | 2021  | China        | SARS-CoV-2 | 29              | 95             | 30.5 (21.6-40.2)           |
| Kandeger et al.                                     | 2020  | Turkey       | SARS-CoV-2 | 29              | 84             | 34.5 (24.7-45.1)           |
| Kang et al.                                         | 2020  | South Korea  | SARS-CoV-2 | 26              | 107            | 24.3 (16.6-32.9)           |
| Kim et al.                                          | 2018  | South Korea  | MERS-CoV   | 11              | 27             | 40.7 (22.8-60.0)           |
| Kim et al.                                          | 2020  | South Korea  | SARS-CoV-2 | 13              | 33             | 39.4 (23.3-56.7)           |
| Kong et al.                                         | 2020  | China        | SARS-CoV-2 | 41              | 144            | 28.5 (21.4-36.1)           |
| Li et al.                                           | 2020  | China        | SARS-CoV-2 | 50              | 99             | 50.5 (40.6-60.4)           |
| Ma et al.                                           | 2020  | China        | SARS-CoV-2 | 332             | 770            | 43.1 (39.6-46.6)           |
| Martillo et al.                                     | 2021  | USA          | SARS-CoV-2 | 17              | 42             | 40.5 (26.0-55.8)           |
| Mina et al.                                         | 2021  | Bangladesh   | SARS-CoV-2 | 82              | 145            | 56.6 (48.4-64.5)           |
| Park et al.                                         | 2020  | South Korea  | MERS-CoV   | 50              | 63             | 79.4 (68.4-88.6)           |
| Parker et al.                                       | 2021  | USA          | SARS-CoV-2 | 17              | 58             | 29.3 (18.2-41.8)           |
| Paz et al.                                          | 2020  | Ecuador      | SARS-CoV-2 | 399             | 759            | 52.6 (49.0-56.1)           |
| Sahan et al.                                        | 2021  | Turkey       | SARS-CoV-2 | 118             | 281            | 42.0 (36.3-47.8)           |
| Samrah et al.                                       | 2020  | Jordan       | SARS-CoV-2 | 29              | 66             | 43.9 (32.1-56.1)           |
| Speth et al.                                        | 2020  | Switzerland  | SARS-CoV-2 | 54              | 114            | 47.4 (38.2-56.6)           |
| Wang et al.                                         | 2021  | China        | SARS-CoV-2 | 246             | 460            | 53.5 (48.9-58.0)           |
| Yadav et al.                                        | 2021  | India        | SARS-CoV-2 | 27              | 100            | 27.0 (18.7-36.2)           |
| Zarghami et al.                                     | 2020  | Iran         | SARS-CoV-2 | 13              | 30             | 43.3 (26.0-61.5)           |
| Zarghami et al.                                     | 2020  | Iran         | SARS-CoV-2 | 18              | 52             | 34.6 (22.2-48.2)           |
| Zhang et al.                                        | 2020a | China        | SARS-CoV-2 | 30              | 30             | 100.0 (94.3-100.0)         |
| Zhang et al.                                        | 2020b | China        | SARS-CoV-2 | 55              | 296            | 18.6 (14.3-23.2)           |
| <b>Summary Effect</b>                               |       |              |            | <b>2662</b>     | <b>5472</b>    | <b>45.3 (38.0-52.7)</b>    |

**eTable 6:** Continued

| Severity, Domain, Timepoint<br>First author | Year  | Country      | Epidemic   | No. of<br>cases | Sample<br>size | Pooled prevalence (95% CI) |
|---------------------------------------------|-------|--------------|------------|-----------------|----------------|----------------------------|
| <b>Mild depression, ongoing</b>             |       |              |            |                 |                |                            |
| Bonazza et al.                              | 2020  | Italy        | SARS-CoV-2 | 44              | 261            | 16.9 (12.5-21.7)           |
| Kwek et al.                                 | 2006  | Singapore    | SARS-CoV-1 | 17              | 63             | 27.0 (16.7-38.7)           |
| Olanipekun et al.                           | 2021  | USA          | SARS-CoV-2 | 51              | 73             | 69.9 (58.8-79.9)           |
| Raman et al.                                | 2021  | UK           | SARS-CoV-2 | 24              | 57             | 42.1 (29.5-55.2)           |
| Rass et al.                                 | 2021  | Austria      | SARS-CoV-2 | 8               | 98             | 8.2 (3.4-14.5)             |
| <b>Summary Effect</b>                       |       |              |            | <b>144</b>      | <b>552</b>     | <b>30.8 (11.7-54.1)</b>    |
| <b>Mild depression, post-illness</b>        |       |              |            |                 |                |                            |
| Bah et al.                                  | 2020  | Sierra Leone | Ebolavirus | 93              | 197            | 47.2 (40.3-54.2)           |
| Luyt et al.                                 | 2012  | France       | H1N1       | 10              | 37             | 27.0 (13.8-42.6)           |
| Park et al.                                 | 2020  | South Korea  | MERS-CoV   | 35              | 63             | 55.6 (43.1-67.7)           |
| Secor et al.                                | 2020  | Liberia      | Ebolavirus | 96              | 198            | 48.5 (41.5-55.5)           |
| Secor et al.                                | 2020  | Sierra Leone | Ebolavirus | 350             | 751            | 46.6 (43.0-50.2)           |
| Secor et al.                                | 2020  | Guinea       | Ebolavirus | 178             | 529            | 33.6 (29.7-37.7)           |
| <b>Summary Effect</b>                       |       |              |            | <b>762</b>      | <b>1775</b>    | <b>43.5 (34.1-53.1)</b>    |
| <b>Moderate-to-severe depression, acute</b> |       |              |            |                 |                |                            |
| Chen et al.                                 | 2021  | China        | SARS-CoV-2 | 189             | 898            | 21.0 (18.4-23.8)           |
| Chen et al.                                 | 2020  | China        | SARS-CoV-2 | 2               | 31             | 6.5 (0.1-18.5)             |
| Guo et al.                                  | 2020  | China        | SARS-CoV-2 | 18              | 103            | 17.5 (10.7-25.5)           |
| He et al.                                   | 2021  | China        | SARS-CoV-2 | 18              | 65             | 27.7 (17.4-39.3)           |
| Hu et al.                                   | 2020  | China        | SARS-CoV-2 | 21              | 85             | 24.7 (16.1-34.5)           |
| Islam et al.                                | 2021  | Bangladesh   | SARS-CoV-2 | 482             | 1002           | 48.1 (45.0-51.2)           |
| Jeong et al.                                | 2020  | South Korea  | SARS-CoV-2 | 20              | 126            | 15.9 (10.0-22.8)           |
| Ju et al.                                   | 2021  | China        | SARS-CoV-2 | 17              | 95             | 17.9 (10.8-26.3)           |
| Ju et al.                                   | 2021  | China        | SARS-CoV-2 | 13              | 95             | 13.7 (7.4-21.4)            |
| Kang et al.                                 | 2020  | South Korea  | SARS-CoV-2 | 7               | 107            | 6.5 (2.5-12.1)             |
| Kim et al.                                  | 2018  | South Korea  | MERS-CoV   | 3               | 27             | 11.1 (1.5-26.3)            |
| Kong et al.                                 | 2020  | China        | SARS-CoV-2 | 21              | 144            | 14.6 (9.2-20.9)            |
| Li et al.                                   | 2020  | China        | SARS-CoV-2 | 29              | 99             | 29.3 (20.7-38.7)           |
| Ma et al.                                   | 2020  | China        | SARS-CoV-2 | 143             | 770            | 18.6 (15.9-21.4)           |
| Martillo et al.                             | 2021  | USA          | SARS-CoV-2 | 8               | 42             | 19.0 (8.4-32.5)            |
| Park et al.                                 | 2020  | South Korea  | MERS-CoV   | 42              | 63             | 66.7 (54.5-77.8)           |
| Parker et al.                               | 2021  | USA          | SARS-CoV-2 | 12              | 58             | 20.7 (11.1-32.2)           |
| Paz et al.                                  | 2020  | Ecuador      | SARS-CoV-2 | 154             | 759            | 20.3 (17.5-23.2)           |
| Samrah et al.                               | 2020  | Jordan       | SARS-CoV-2 | 14              | 66             | 21.2 (12.1-32.0)           |
| Speth et al.                                | 2020  | Switzerland  | SARS-CoV-2 | 24              | 114            | 21.1 (14.0-29.1)           |
| Wang et al.                                 | 2021  | China        | SARS-CoV-2 | 114             | 460            | 24.8 (20.9-28.8)           |
| Wu et al.                                   | 2005a | China        | SARS-CoV-1 | 35              | 195            | 17.9 (12.9-23.7)           |
| Wu et al.                                   | 2005b | China        | SARS-CoV-1 | 23              | 131            | 17.6 (11.5-24.6)           |
| Xu et al.                                   | 2021  | China        | SARS-CoV-2 | 12              | 121            | 9.9 (5.1-16.0)             |
| Yadav et al.                                | 2021  | India        | SARS-CoV-2 | 6               | 100            | 6.0 (2.0-11.6)             |
| Zhang et al.                                | 2020a | China        | SARS-CoV-2 | 23              | 30             | 76.7 (59.6-90.3)           |
| <b>Summary Effect</b>                       |       |              |            | <b>1450</b>     | <b>5786</b>    | <b>21.9 (15.8-28.6)</b>    |

**eTable 6:** Continued

| Severity, Domain, Timepoint<br>First author            | Year  | Country      | Epidemic   | No. of<br>cases | Sample<br>size | Pooled prevalence (95% CI) |
|--------------------------------------------------------|-------|--------------|------------|-----------------|----------------|----------------------------|
| <b>Moderate-to-severe depression,<br/>ongoing</b>      |       |              |            |                 |                |                            |
| Bonazza et al.                                         | 2020  | Italy        | SARS-CoV-2 | 27              | 261            | 10.3 (6.9-14.4)            |
| D'Cruz et al.                                          | 2021  | UK           | SARS-CoV-2 | 20              | 111            | 18.0 (11.4-25.8)           |
| Kwek et al.                                            | 2006  | Singapore    | SARS-CoV-1 | 7               | 63             | 11.1 (4.3-20.2)            |
| Olanipekun et al.                                      | 2021  | USA          | SARS-CoV-2 | 40              | 73             | 54.8 (43.2-66.1)           |
| Poyraz et al.                                          | 2021  | Turkey       | SARS-CoV-2 | 51              | 284            | 18.0 (13.7-22.7)           |
| Raman et al.                                           | 2021  | UK           | SARS-CoV-2 | 11              | 57             | 19.3 (10.0-30.7)           |
| Rass et al.                                            | 2021  | Austria      | SARS-CoV-2 | 3               | 98             | 3.1 (0.4-7.6)              |
| van den Borst et al.                                   | 2020  | Netherlands  | SARS-CoV-2 | 14              | 124            | 11.3 (6.2-17.5)            |
| Wu et al.                                              | 2005b | China        | SARS-CoV-1 | 17              | 131            | 13.0 (7.7-19.3)            |
| <b>Summary Effect</b>                                  |       |              |            | <b>190</b>      | <b>1202</b>    | <b>16.0 (8.6-25.2)</b>     |
| <b>Moderate-to-severe depression,<br/>post-illness</b> |       |              |            |                 |                |                            |
| Etard et al.                                           | 2017  | Guinea       | Ebolavirus | 97              | 472            | 20.6 (17.0-24.3)           |
| Keita et al.                                           | 2017  | Guinea       | Ebolavirus | 38              | 256            | 14.8 (10.7-19.5)           |
| Lee et al.                                             | 2019  | South Korea  | MERS-CoV   | 14              | 52             | 26.9 (15.6-39.9)           |
| Lee et al.                                             | 2019  | South Korea  | MERS-CoV   | 9               | 52             | 17.3 (8.1-28.9)            |
| Mak et al.                                             | 2009  | China        | SARS-CoV-1 | 17              | 90             | 18.9 (11.4-27.7)           |
| Park et al.                                            | 2020  | South Korea  | MERS-CoV   | 17              | 63             | 27.0 (16.7-38.7)           |
| Secor et al.                                           | 2020  | Liberia      | Ebolavirus | 43              | 198            | 21.7 (16.2-27.8)           |
| Secor et al.                                           | 2020  | Sierra Leone | Ebolavirus | 136             | 751            | 18.1 (15.4-20.9)           |
| Secor et al.                                           | 2020  | Guinea       | Ebolavirus | 49              | 529            | 9.3 (6.9-11.9)             |
| <b>Summary Effect</b>                                  |       |              |            | <b>420</b>      | <b>2463</b>    | <b>18.2 (13.8-23.0)</b>    |
| <b>Mild post-traumatic stress, acute</b>               |       |              |            |                 |                |                            |
| Bellan et al.                                          | 2021  | Italy        | SARS-CoV-2 | 102             | 238            | 42.9 (36.6-49.2)           |
| Chieffo et al.                                         | 2020  | Italy        | SARS-CoV-2 | 27              | 33             | 81.8 (66.6-93.4)           |
| <b>Summary Effect</b>                                  |       |              |            | <b>129</b>      | <b>271</b>     | <b>62.4 (23.6-93.8)</b>    |
| <b>Mild post-traumatic stress, ongoing</b>             |       |              |            |                 |                |                            |
| Kwek et al.                                            | 2006  | Singapore    | SARS-CoV-1 | 26              | 63             | 41.3 (29.4-53.7)           |
| Poyraz et al.                                          | 2021  | Turkey       | SARS-CoV-2 | 124             | 284            | 43.7 (37.9-49.5)           |
| <b>Summary Effect</b>                                  |       |              |            | <b>150</b>      | <b>347</b>     | <b>43.2 (38.0-48.5)</b>    |
| <b>Mild post-traumatic stress, post-illness</b>        |       |              |            |                 |                |                            |
| Chieffo et al.                                         | 2020  | Italy        | SARS-CoV-2 | 7               | 14             | 50.0 (23.7-76.3)           |
| Lee et al.                                             | 2019  | South Korea  | MERS-CoV   | 22              | 52             | 42.3 (29.1-56.0)           |
| Lee et al.                                             | 2019  | South Korea  | MERS-CoV   | 14              | 52             | 26.9 (15.6-39.9)           |
| Park et al.                                            | 2020  | South Korea  | MERS-CoV   | 27              | 63             | 42.9 (30.8-55.3)           |
| <b>Summary Effect</b>                                  |       |              |            | <b>70</b>       | <b>181</b>     | <b>38.6 (24.0-54.3)</b>    |

**eTable 6:** Continued

| Severity, Domain, Timepoint<br>First author                   | Year  | Country     | Epidemic   | No. of cases | Sample size | Pooled prevalence (95% CI) |
|---------------------------------------------------------------|-------|-------------|------------|--------------|-------------|----------------------------|
| <b>Moderate-to-severe post-traumatic stress, acute</b>        |       |             |            |              |             |                            |
| Bellan et al.                                                 | 2021  | Italy       | SARS-CoV-2 | 41           | 238         | 17.2 (12.7-22.3)           |
| Chieffo et al.                                                | 2020  | Italy       | SARS-CoV-2 | 19           | 33          | 57.6 (40.2-74.1)           |
| Horn et al.                                                   | 2020  | France      | SARS-CoV-2 | 60           | 179         | 33.5 (26.8-40.6)           |
| Mazza et al.                                                  | 2020  | Italy       | SARS-CoV-2 | 71           | 300         | 23.7 (19.0-28.7)           |
| Mazza et al.                                                  | 2020  | Italy       | SARS-CoV-2 | 34           | 102         | 33.3 (24.5-42.8)           |
| Wu et al.                                                     | 2005a | China       | SARS-CoV-1 | 11           | 195         | 5.6 (2.8-9.4)              |
| Wu et al.                                                     | 2005b | China       | SARS-CoV-1 | 6            | 131         | 4.6 (1.5-8.9)              |
| <b>Summary Effect</b>                                         |       |             |            | <b>242</b>   | <b>1178</b> | <b>25.3 (7.5-48.9)</b>     |
| <b>Moderate-to-severe post-traumatic stress, ongoing</b>      |       |             |            |              |             |                            |
| Bonazza et al.                                                | 2020  | Italy       | SARS-CoV-2 | 67           | 184         | 36.4 (29.6-43.5)           |
| Kwek et al.                                                   | 2006  | Singapore   | SARS-CoV-1 | 23           | 63          | 36.5 (25.0-48.8)           |
| Poyraz et al.                                                 | 2021  | Turkey      | SARS-CoV-2 | 72           | 284         | 25.4 (20.5-30.6)           |
| van den Borst et al.                                          | 2020  | Netherlands | SARS-CoV-2 | 12           | 122         | 9.8 (5.1-15.8)             |
| Wu et al.                                                     | 2005b | China       | SARS-CoV-1 | 7            | 131         | 5.3 (2.0-10.0)             |
| <b>Summary Effect</b>                                         |       |             |            | <b>181</b>   | <b>784</b>  | <b>20.9 (9.2-35.7)</b>     |
| <b>Moderate-to-severe post-traumatic stress, post-illness</b> |       |             |            |              |             |                            |
| Chieffo et al.                                                | 2020  | Italy       | SARS-CoV-2 | 4            | 14          | 28.6 (7.4-55.4)            |
| Luyt et al.                                                   | 2012  | France      | H1N1       | 16           | 37          | 43.2 (27.6-59.6)           |
| <b>Summary Effect</b>                                         |       |             |            | <b>20</b>    | <b>51</b>   | <b>39.1 (25.7-53.2)</b>    |
| <b>Moderate-to-severe general distress, ongoing</b>           |       |             |            |              |             |                            |
| Cheng et al.                                                  | 2004  | China       | SARS-CoV-1 | 68           | 100         | 68.0 (58.5-76.8)           |
| Sheng et al.                                                  | 2005  | China       | SARS-CoV-1 | 66           | 102         | 64.7 (55.1-73.7)           |
| <b>Summary Effect</b>                                         |       |             |            | <b>134</b>   | <b>202</b>  | <b>66.3 (59.6-72.7)</b>    |
| <b>Single prevalence rates (no pooling)</b>                   |       |             |            |              |             |                            |
| Wang et al.<br>(mild somatization, acute)                     | 2021  | China       | SARS-CoV-2 | 304          | 460         | 66.1 (61.7-70.3)           |
| Mowla et al.<br>(moderate general distress, acute)            | 2021  | Iran        | SARS-CoV-2 | 69           | 69          | 100.0 (97.5-100.0)         |
| Wang et al.<br>(moderate somatization, acute)                 | 2021  | China       | SARS-CoV-2 | 167          | 460         | 36.3 (32.0-40.8)           |
| Lam et al.<br>(depression and anxiety jointly, post-illness)  | 2009  | China       | SARS-CoV-1 | 83           | 170         | 48.8 (41.3-56.4)           |
| Lee et al.<br>(moderate general distress, post-illness)       | 2007  | China       | SARS-CoV-1 | 61           | 96          | 63.5 (53.6-72.9)           |

**eTable 7:** Test of moderators on mild or moderate mental health problems including all domains. All moderators were tested separately and adjusted for follow-up time in months

| Moderator variable                               | Mild mental health problems             |                 | Moderate mental health problems         |                 |
|--------------------------------------------------|-----------------------------------------|-----------------|-----------------------------------------|-----------------|
|                                                  | Coefficient <sub>arcsine</sub> (95% CI) | <i>p</i> -value | Coefficient <sub>arcsine</sub> (95% CI) | <i>p</i> -value |
| Proportion of females                            | 0.001 (-0.005 to 0.006)                 | 0.7390          | <0.000 (-0.005 to 0.004)                | 0.8835          |
| Mean/median (years)                              | -0.007 (-0.014 to 0.001)                | 0.0926          | -0.001 (-0.007 to 0.005)                | 0.7696          |
| Proportion with higher education                 | -0.004 (-0.008 to 0.001)                | 0.1023          | -0.002 (-0.006 to 0.003)                | 0.4891          |
| Proportion with previous mental health condition | -0.005 (-0.016 to 0.006)                | 0.3292          | 0.003 (-0.006 to 0.013)                 | 0.5027          |
| Proportion of health care workers                | -0.007 (-0.019 to 0.005)                | 0.2425          | -0.004 (-0.014 to 0.006)                | 0.4457          |
| Duration of hospitalization (days)               | 0.010 (-0.007 to 0.026)                 | 0.2427          | 0.007 (-0.004 to 0.018)                 | 0.2066          |
| Proportion with intensive care unit treatment    | 0.000 (-0.004 to 0.004)                 | 0.9523          | 0.002 (-0.001 to 0.005)                 | 0.1456          |
| Type of treatment                                |                                         |                 |                                         |                 |
| Inpatient treatment                              | reference                               |                 | reference                               |                 |
| Miscellaneous                                    | -0.022 (-0.232 to 0.188)                | 0.8349          | -0.072 (-0.217 to 0.072)                | 0.3227          |
| Outpatient                                       | -0.018 (-0.252 to 0.217)                | 0.8821          | 0.021 (-0.174 to 0.216)                 | 0.8301          |
| Response rate (%)                                | 0.000 (-0.003 to 0.002)                 | 0.8243          | 0.000 (-0.002 to 0.003)                 | 0.8859          |
| Sampling                                         |                                         |                 |                                         |                 |
| Non-random                                       | reference                               |                 | reference                               |                 |
| Random                                           | -0.161 (-0.280 to -0.043)               | 0.0083          | -0.015 (-0.095 to 0.065)                | 0.7122          |
| World region                                     |                                         |                 |                                         |                 |
| China                                            | reference                               |                 | reference                               |                 |
| Other Asia                                       | -0.066 (-0.235 to 0.103)                | 0.4366          | 0.023 (-0.110 to 0.157)                 | 0.7284          |
| Europe                                           | -0.112 (-0.276 to 0.051)                | 0.1753          | 0.013 (-0.110 to 0.137)                 | 0.8309          |
| Africa                                           | 0.047 (-0.296 to 0.390)                 | 0.7869          | 0.046 (-0.188 to 0.281)                 | 0.6955          |
| America                                          | -0.007 (-0.246 to 0.232)                | 0.9531          | 0.068 (-0.126 to 0.262)                 | 0.4905          |
| Epidemic                                         |                                         |                 |                                         |                 |
| SARS-CoV-2                                       | reference                               |                 | reference                               |                 |
| SARS-CoV-1                                       | 0.231 (-0.146 to 0.608)                 | 0.2260          | 0.067 (-0.141 to 0.275)                 | 0.5252          |
| MERS-CoV                                         | 0.102 (-0.169 to 0.372)                 | 0.4568          | 0.145 (-0.038 to 0.329)                 | 0.1183          |
| Ebolavirus                                       | 0.229 (-0.158 to 0.616)                 | 0.2424          | 0.113 (-0.123 to 0.349)                 | 0.3458          |
| H1N1                                             | 0.116 (-0.336 to 0.568)                 | 0.6097          | 0.392 (0.003 to 0.782)                  | 0.0483          |
| Timepoint of follow-up                           |                                         |                 |                                         |                 |
| Acute                                            | Reference                               |                 | Reference                               |                 |
| Mild                                             | -0.130 (-0.305 to 0.045)                | 0.1432          | -0.044 (-0.135 to 0.047)                | 0.3379          |
| Post-illness                                     | -0.184 (-0.307 to -0.061)               | 0.0038          | -0.146 (-0.253 to -0.039)               | 0.0080          |

Shown are coefficients for a meta-regression model including arcsine transformed proportions. In categorical moderators the coefficients indicate the comparison between a respective factor level and the reference group. H1N1=Swine flu. MERS-CoV=Middle East respiratory syndrome coronavirus. SARS-CoV-1=Severe acute respiratory syndrome coronavirus 1. SARS-CoV-2=Severe acute respiratory syndrome coronavirus 2. All moderators were tested separately adjusted for follow-up time in month. A moderator analysis including all moderators jointly was not possible due to the substantial number of missing information across the studies.
